# Supplementary material for: CTLA4 blockade abrogates KEAP1/STK11-related resistance to PD-(L)1 inhibitors
Source: PubMed Central journal article supplement — Nature. 2024 Oct 9;635(8038):462–71. doi: 10.1038/s41586-024-07943-7 (PMC11560846; doi:10.1038/s41586-024-07943-7), 2024-10-09
Supplement: 41586_2024_7943_MOESM1_ESM.pdf [file 41586_2024_7943_MOESM1_ESM.pdf]

## Supplementary information

---

# CTLA4 blockade abrogates *KEAP1/STK11*-related resistance to PD-(L)1 inhibitors

---

In the format provided by the  
authors and unedited

| <b>Supplementary Table 1. sgRNA sequences utilized for multiplexed assessment of TSG targets</b> |                       |
|--------------------------------------------------------------------------------------------------|-----------------------|
| <b>sgRNA target</b>                                                                              | <b>sgRNA sequence</b> |
| <i>Apc</i>                                                                                       | TTGAGCGTAGTTTCACTCCG  |
| <i>Arid2</i>                                                                                     | GGCAGTTCCACCACAGCAGA  |
| <i>Atm</i>                                                                                       | GTATCTCAGCAACAGTGGCT  |
| <i>Atrx</i>                                                                                      | CAGGTTCATCAAGGTCAAAG  |
| <i>Brca2</i>                                                                                     | GTACCCAAAGTCTCGTCAAG  |
| <i>Cdkn2a</i>                                                                                    | CGGTGCAGATTCGAACTGCG  |
| <i>Cmtr2</i>                                                                                     | GTAAGCCACTCGATAATGAG  |
| <i>Keap1</i>                                                                                     | TCAAATACGACTGCCCGCAG  |
| <i>Kmt2d</i>                                                                                     | TTGTGCTCTCTGTAAGTGGC  |
| <i>Mga</i>                                                                                       | TTATACCGATGACTATCCAC  |
| <i>Nf1</i>                                                                                       | CCAAACGTAAAGCAGCAGTG  |
| <i>Pten</i>                                                                                      | TCACCTGGATTACAGACCCG  |
| <i>Ptprd</i>                                                                                     | CTTGGTGCGGAGCACATCTG  |
| <i>Rb1</i>                                                                                       | TCTTACCAGGATTCCATCCA  |
| <i>Rbm10</i>                                                                                     | GTATTTCTGAACAGATCCG   |
| <i>Rnf43</i>                                                                                     | TAGACAGATGGCACACACGG  |
| <i>Setd2</i>                                                                                     | TCTCTAATCCATCTTCCCAG  |
| <i>Smad4</i>                                                                                     | GATGTGTCATAGACAAGGTG  |
| <i>Stag2</i>                                                                                     | GGTCAAGAAGCGCTATGTCC  |
| <i>Stk11</i>                                                                                     | CCACTCTCTGACCTACTCCG  |
| <i>Trp53</i>                                                                                     | AGGAGCTCCTGACACTCGGA  |
| <i>Tsc1</i>                                                                                      | ATCGTGTGGCTCCTGCAAGG  |

| <b>Supplementary Table 2. PCR protocol</b> |                         |             |               |
|--------------------------------------------|-------------------------|-------------|---------------|
| <b>Step</b>                                | <b>Temperature (°C)</b> | <b>Time</b> | <b>Cycles</b> |
| Initial Denaturation                       | 98°C                    | 30 seconds  |               |
| Denaturation                               | 98°C                    | 10 seconds  | x27           |
| Annealing                                  | 63°C                    | 10 seconds  |               |
| Extension                                  | 72°C                    | 10 seconds  |               |
| Final Extension                            | 72°C                    | 5 minutes   |               |
| Hold                                       | 4°C                     | ∞           |               |
